# Supplementary material for: TGF-β–induced epigenetic deregulation of SOCS3 facilitates STAT3 signaling to promote fibrosis
Source: JCI journal article supplement (doi:10.1172/jci122462), 2020-01-28
Supplement: sd1 [file 1]

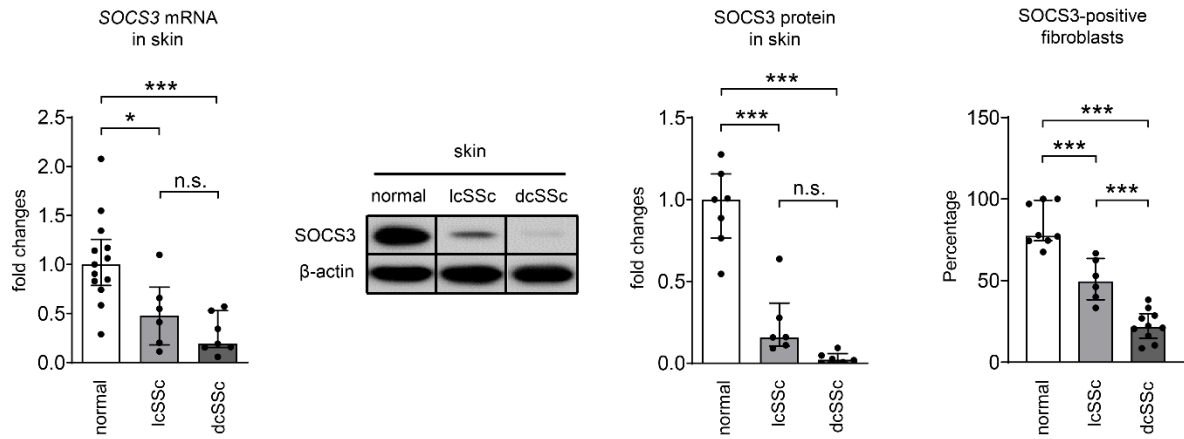

**Supplementary Figure 1: Expression of SOCS3 in limited- and diffuse-cutaneous SSc.** mRNA (n = 14 for normal skin samples, n = 7 for both lcSSc and dcSSc skin samples) and protein levels (n = 7 for normal skin samples, n = 6 for both lcSSc and dcSSc skin samples) and percentage of SOCS3-positive fibroblasts (n = 8 for normal skin samples, n = 6 for lcSSc and n = 10 for dcSSc skin samples) in normal skin and in the skin of patients with limited- (lcSSc) or diffuse-cutaneous SSc (dcSSc).

Data are depicted as the median with interquartile range. Each dot represents an individual result. One-way ANOVA with Tukey's range test as post hoc analysis was used for statistical analyses.

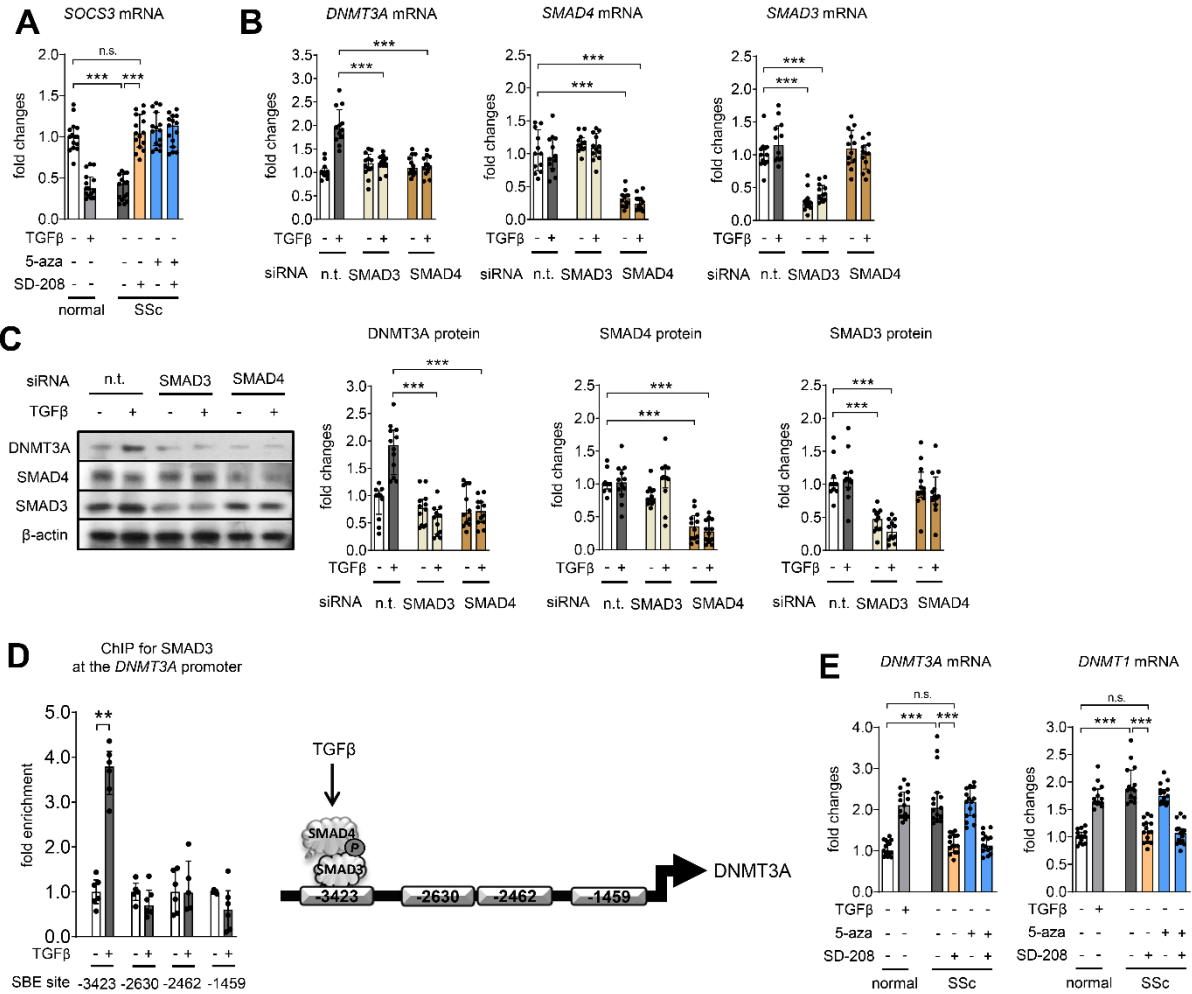

**Supplementary Figure 2: TGFβ induces DNMT3A expression via canonical SMAD signaling.** (A) *SOCS3* mRNA levels in SSc fibroblasts incubated with the TBRI kinase inhibitor SD-208 (n = 5 fibroblast lines from different donors with three technical replicates each). (B) Changes in the mRNA levels of *DNMT3A*, *SMAD3* and *SMAD4* in TGFβ-stimulated fibroblasts upon transfection with siRNA against *SMAD3* or *SMAD4* (n = 6 fibroblast lines from different donors with two technical replicates each). (C) Protein levels of DNMT3A, SMAD3 and SMAD4 in TGFβ-stimulated fibroblasts upon transfection with siRNA against *SMAD3* or *SMAD4* (n = 6 fibroblast lines from different donors with two technical replicates each). (D) Binding of SMAD3 on SMAD-binding (SBE) sites in the *DNMT3A* promoter as analyzed by ChIP assays (n = 3 fibroblast lines from different donors with two technical replicates each). (E) Changes in the mRNA levels of *DNMT3A* and *DNMT1* in SSc fibroblasts incubated with the TBRI kinase inhibitor SD-208 (n = 5 fibroblast lines from different donors with three technical replicates each).

Data are depicted as the median with interquartile range. Each dot represents an individual result. One-way ANOVA with Tukey's range test as post hoc analysis was used for statistical analyses.

**A**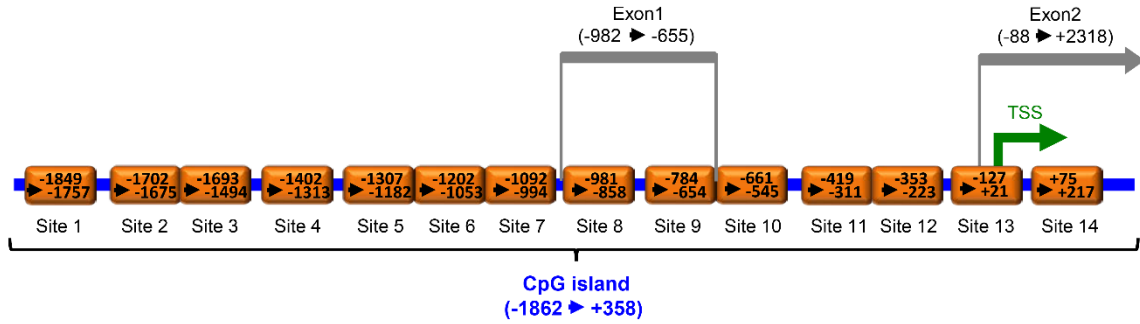**B**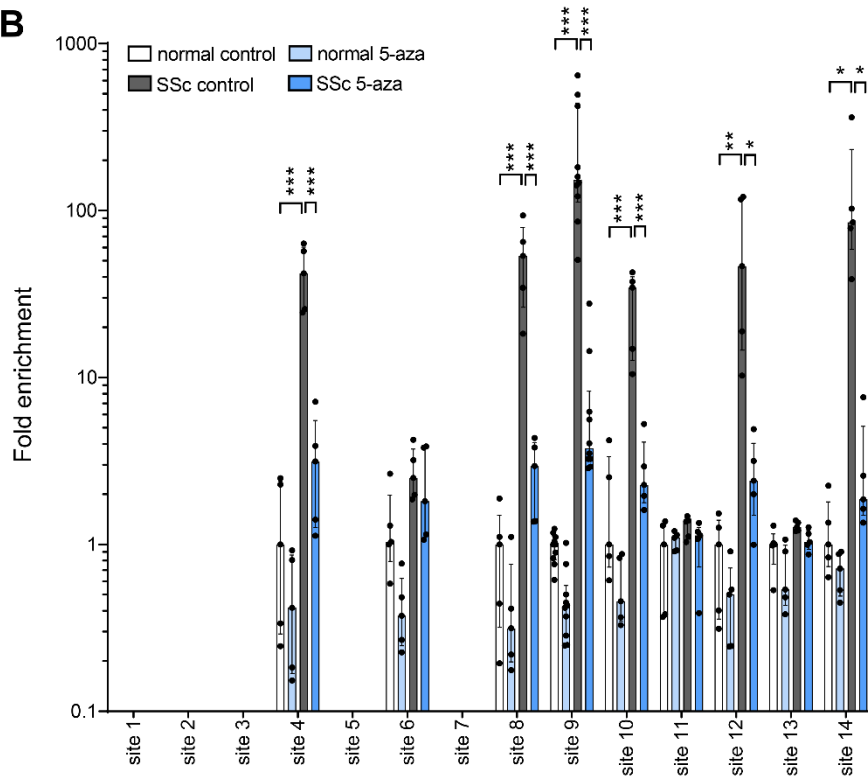

**Supplementary Figure 3: The promoter of *SOCS3* is hypermethylated in SSc fibroblasts.** (A) Scheme of the CpG island within the *SOCS3* promoter region and the sites analyzed by MeDIP. (B) Bar graph with single values of all sites analyzed by MeDIP-qPCR (n = 5 fibroblast lines from different donors).

Data are depicted as the median with interquartile range. Each dot represents an individual result. One-way ANOVA with Tukey's range test as post hoc analysis was used for statistical analyses.

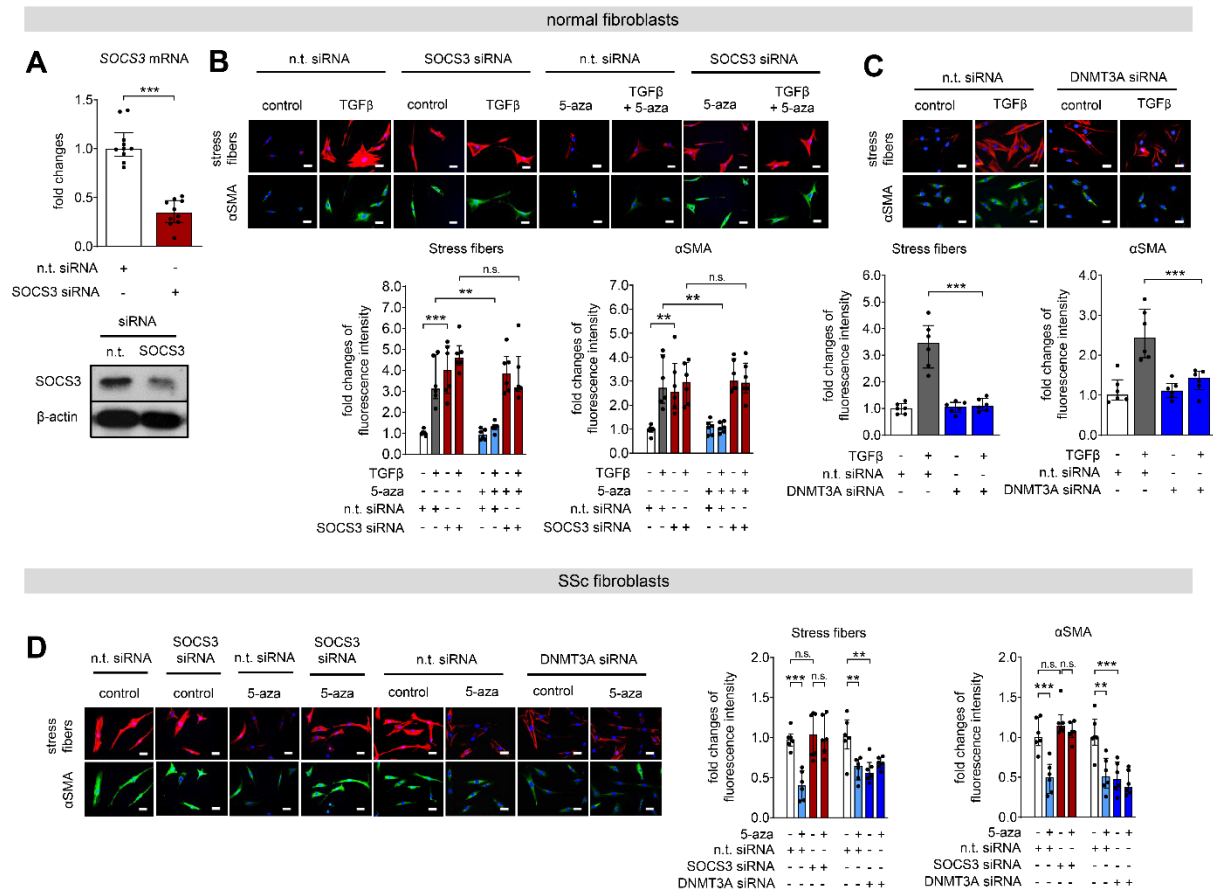

**Supplementary Figure 4: Silencing of SOCS3 induces myofibroblast differentiation, while knockdown of DNMT3A prevents it.** (A) mRNA and protein levels of SOCS3 upon transfection with SOCS3 siRNA in normal dermal fibroblasts (n = 5 fibroblast lines from different donors with two technical replicates each). (B, C) Representative stainings and quantitation of stress fibers (red) and of αSMA (green) upon knockdown of (B) SOCS3 or (C) DNMT3A in normal fibroblasts (n = 3 fibroblast lines from different donors with two technical replicates each; magnification: 200x, Scale bar: 250 μm). (D) Representative stainings and quantitation of stress fibers (red) and of αSMA (green) upon knockdown of SOCS3 or DNMT3A in SSc fibroblasts (n = 3 fibroblast lines from different donors with two technical replicates each; magnification: 200x, Scale bar: 250 μm).

Data are depicted as the median with interquartile range. Each dot represents an individual result. Mann-Whitney U test (panel A) or one-way ANOVA with Tukey's range test as post hoc analysis was used for statistical analyses.

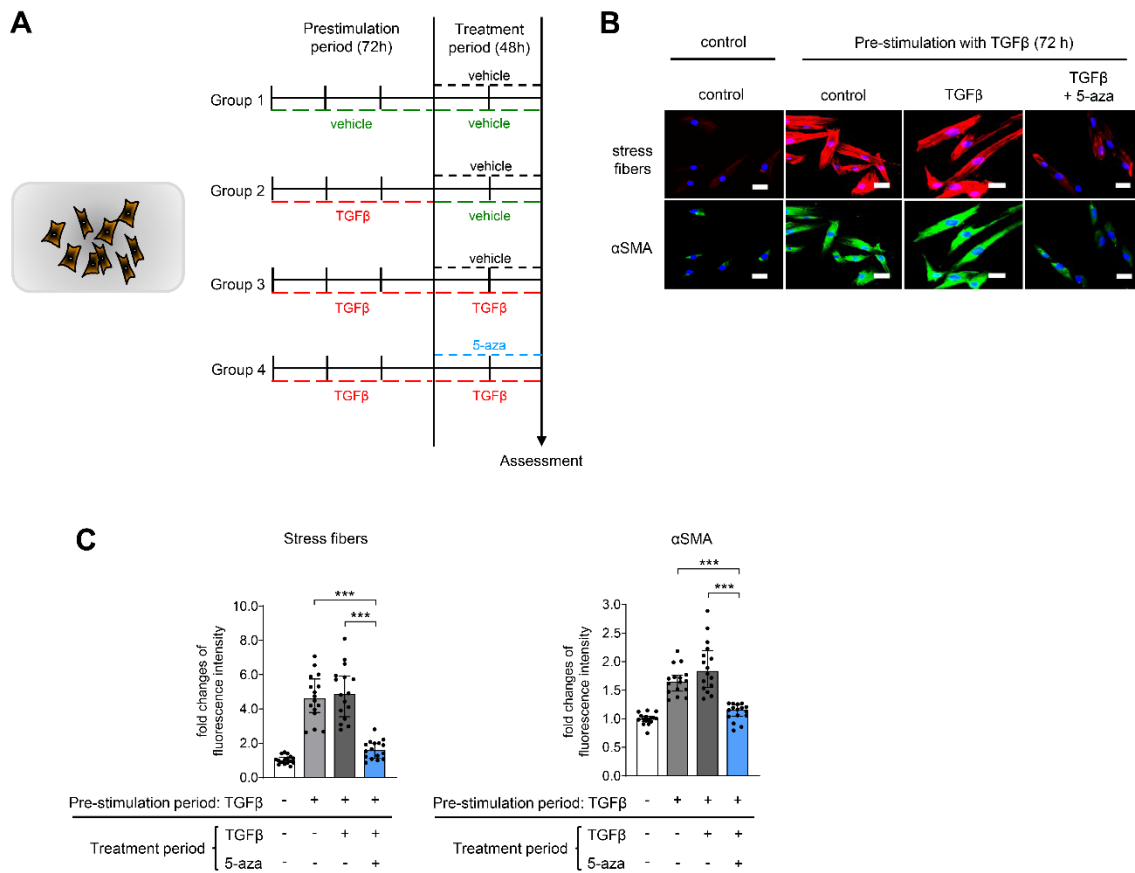

**Supplementary Figure 5: Effects of 5-aza on the persistence of a pre-established, TGFβ-induced myofibroblast phenotype of cultured fibroblasts. (A)** Graphical scheme of the experimental setup. **(B, C)** Representative stainings **(B)** and quantitation **(C)** of stress fibers (red) and of αSMA (green) upon treatment with 5-aza in chronically pre-stimulated normal fibroblasts (n = 8 fibroblast lines from different donors with two technical replicates each; magnification: 200x, Scale bar: 250 μm).

Data are depicted as the median with interquartile range. Each dot represents an individual result. One-way ANOVA with Tukey's range test as post hoc analysis was used for statistical analyses.

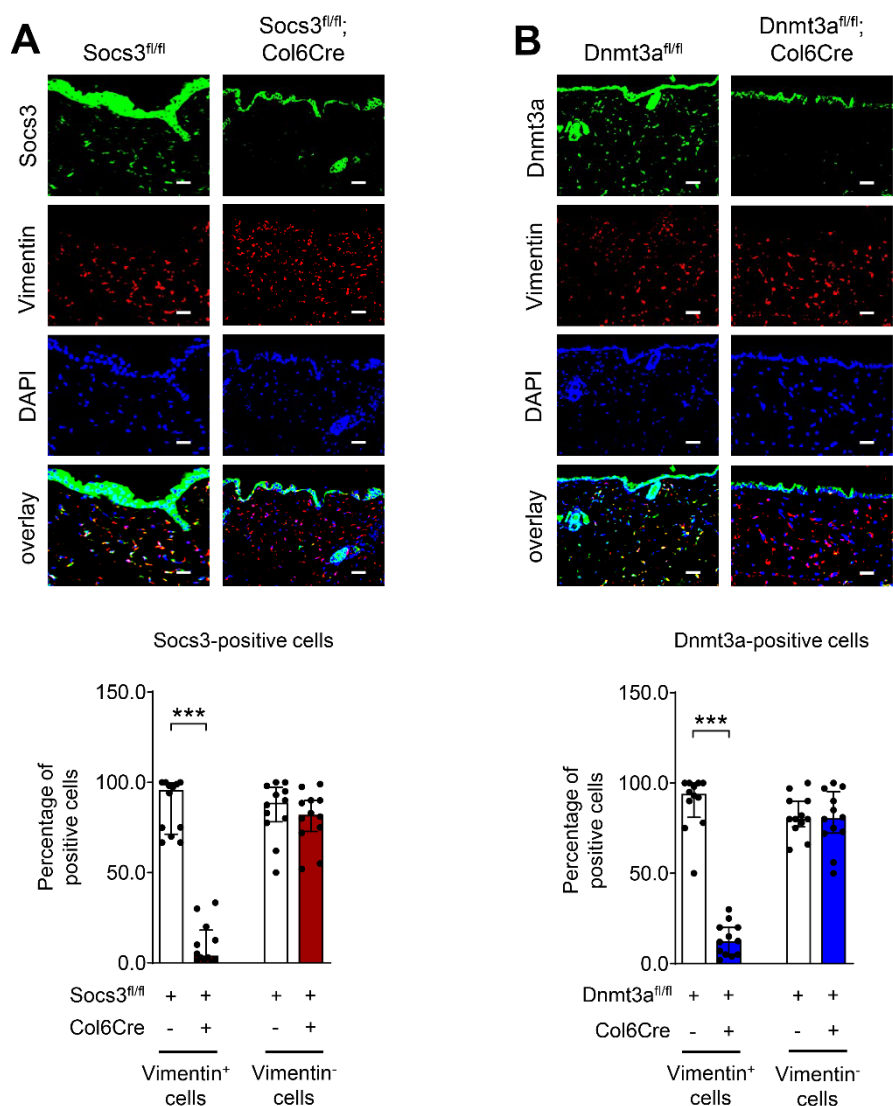

**Supplementary Figure 6: Expression of Socs3 and Dnmt3a in the skin of mice with fibroblast-specific depletion of either Socs3 or Dnmt3a.** (A) Representative images of immunofluorescence stainings for Socs3 and Vimentin in *Socs3<sup>fl/fl</sup>* and *Socs3<sup>fl/fl</sup>;Col6Cre* mice. (B) Co-staining for Dnmt3a and Vimentin in *Dnmt3a<sup>fl/fl</sup>* and *Dnmt3a<sup>fl/fl</sup>;Col6Cre* mice.

All stainings are shown at 200x magnification (n = 4 mice per group with three analyzed sections each; Scale bar: 200  $\mu$ m).

Data are depicted as the median with interquartile range. Each dot represents an individual result. One-way ANOVA with Tukey's range test as post hoc analysis was used for statistical analyses.

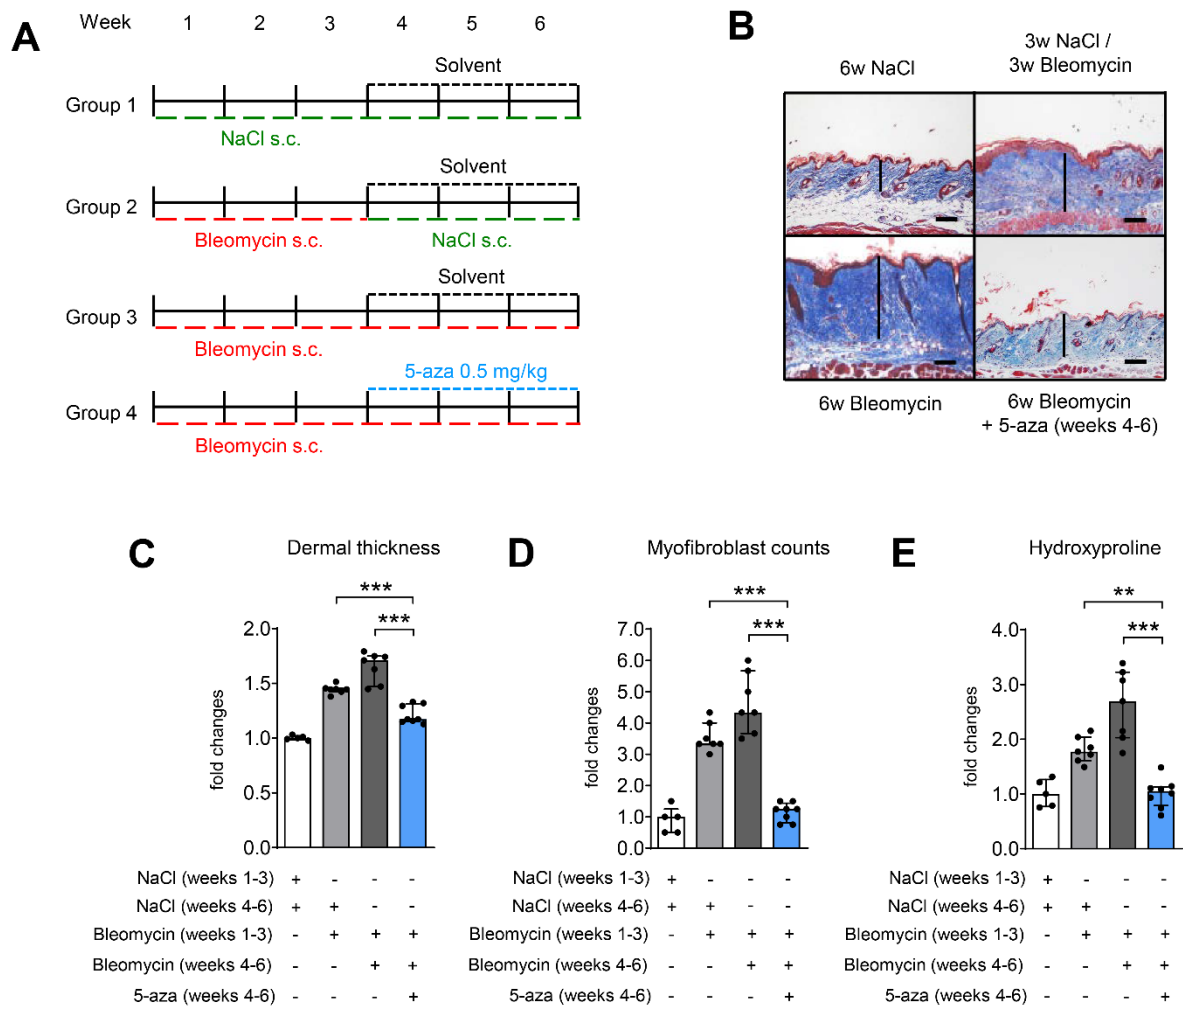

**Supplementary Figure 7: Effects of 5-aza on pre-established bleomycin-induced dermal fibrosis.** (A) Graphical scheme of the experimental setup for the treatment of pre-established fibrosis. (B) Representative images of trichrome-stained sections at 100x magnification (Scale bar: 250  $\mu$ m). (C-E) Relative changes of dermal thickness (C), myofibroblast counts (D), and hydroxyproline content (E) ( $n \geq 5$  mice per group).

Data are depicted as the median with interquartile range. Each dot represents an individual result. One-way ANOVA with Tukey's range test as post hoc analysis was used for statistical analyses.

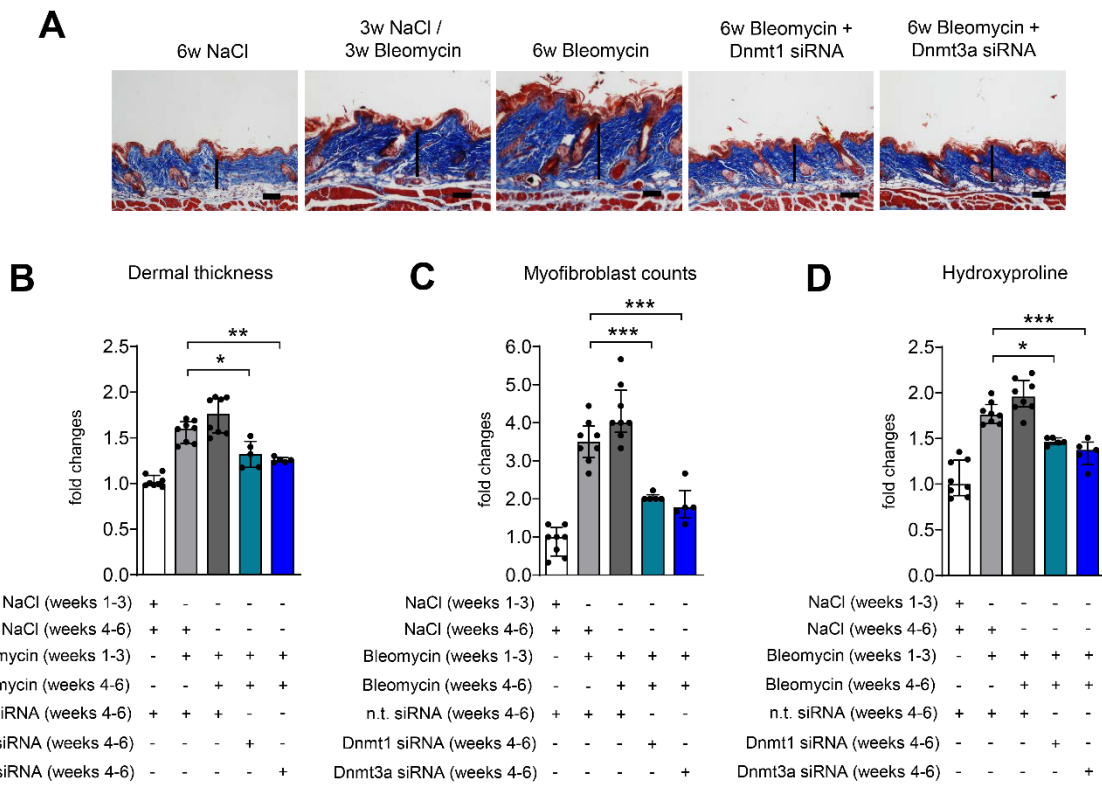

**Supplementary Figure 8: Knockdown of Dnmt1 and Dnmt3a in pre-established bleomycin-induced dermal fibrosis.** (A) Representative images of trichrome-stained sections at 100x magnification (Scale bar: 250  $\mu$ m). (B-D) Relative changes of dermal thickness (B), myofibroblast counts (C), and hydroxyproline content (D) (n = 8 mice per group for control groups with non-targeting siRNAs and n = 5 mice per group for treatment groups with target siRNAs against *Dnmt1* and *Dnmt3a*).

Data are depicted as the median with interquartile range. Each dot represents an individual result. One-way ANOVA with Tukey's range test as post hoc analysis was used for statistical analyses.



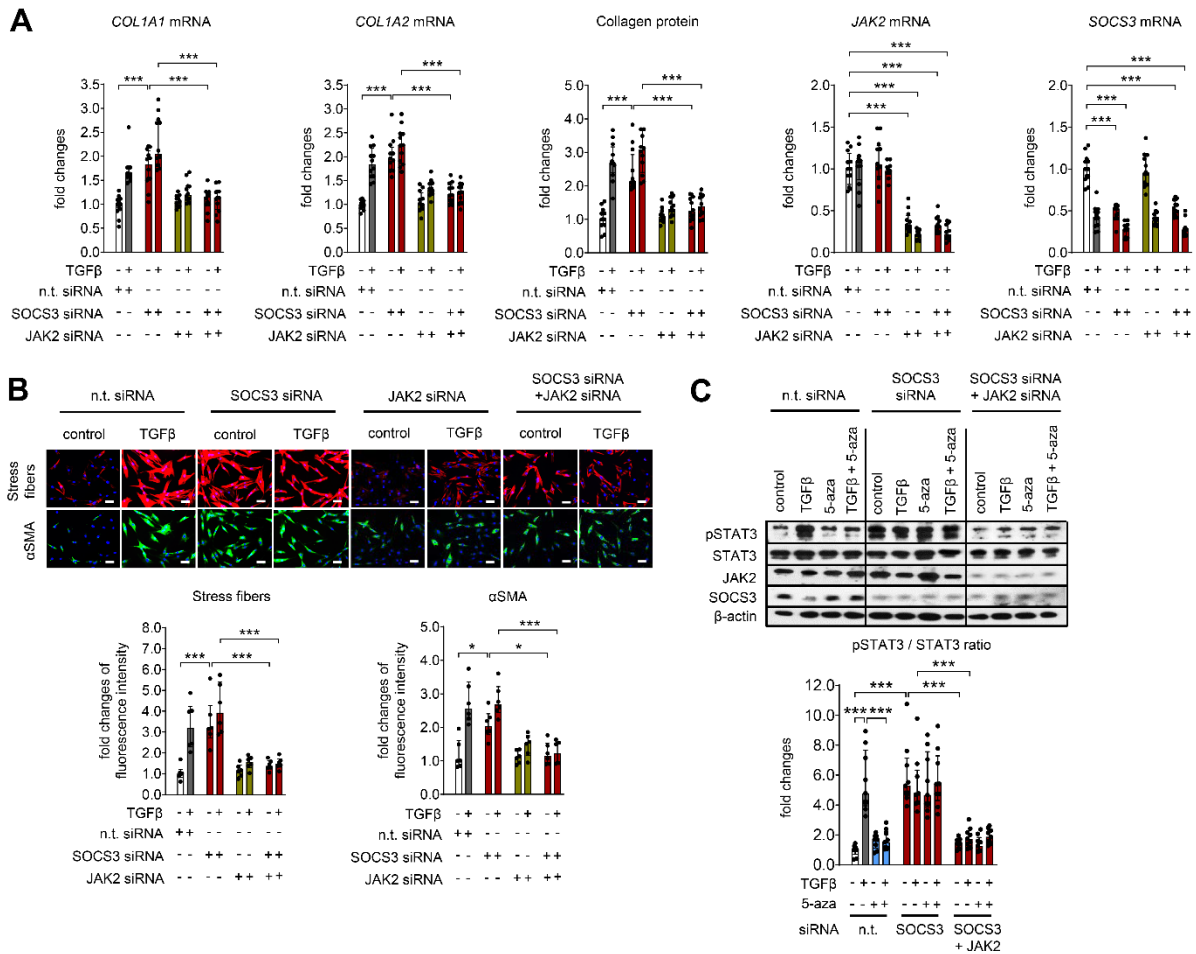

**Supplementary Figure 9: SOCS3 regulates TGFβ-induced fibroblast activation by inhibition of JAK2-STAT3 signaling.** (A) mRNA levels of *COL1A1*, *COL1A2*, *JAK2*, and *SOCS3*, and collagen protein content in cell culture media upon individual or combined siRNA-mediated knockdown of JAK2 and SOCS3 in normal dermal fibroblasts (n = 6 fibroblast lines from different donors with two technical replicates each). (B) Representative stainings and quantitation of stress fibers (red) and αSMA (green) upon individual or combined knockdown of SOCS3 and JAK2 in normal fibroblasts (n = 3 fibroblast lines from different donors with two technical replicates each; magnification: 200x; Scale bar: 250 μm). (C) Representative Western blot for p-STAT3, STAT3, JAK2 and SOCS3, and quantitation of the pSTAT3 / STAT3 ratio upon knockdown of JAK2 and SOCS3 (n = 3 fibroblast lines from different donors with three technical replicates each).

Data are depicted as the median with interquartile range. Each dot represents an individual result. One-way ANOVA with Tukey's range test as post hoc analysis was used for statistical analyses.

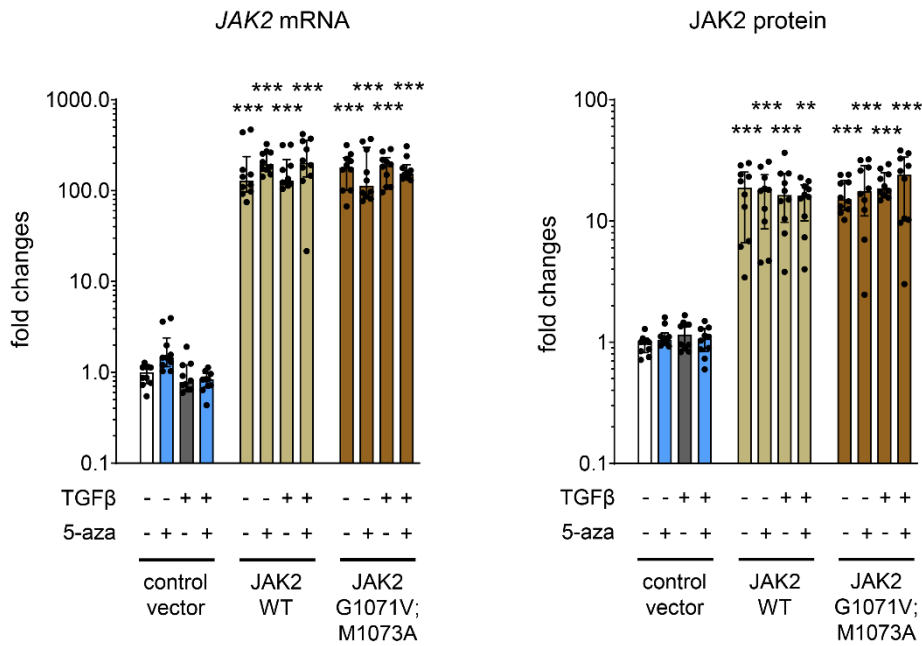

**Supplementary Figure 10:** mRNA and protein levels of JAK2 upon overexpression of wildtype JAK2 (JAK2-WT) or mutated JAK2 with a defective SOCS3 bindings site (JAK2-G1071V;M1073A) in dermal fibroblasts from healthy individuals (n = 5 fibroblast lines from different donors with two technical replicates each). Significance was tested against untreated cells transfected with control vector.

Data are depicted as the median with interquartile range. Each dot represents an individual result. One-way ANOVA with Tukey's range test as post hoc analysis was used for statistical analyses.

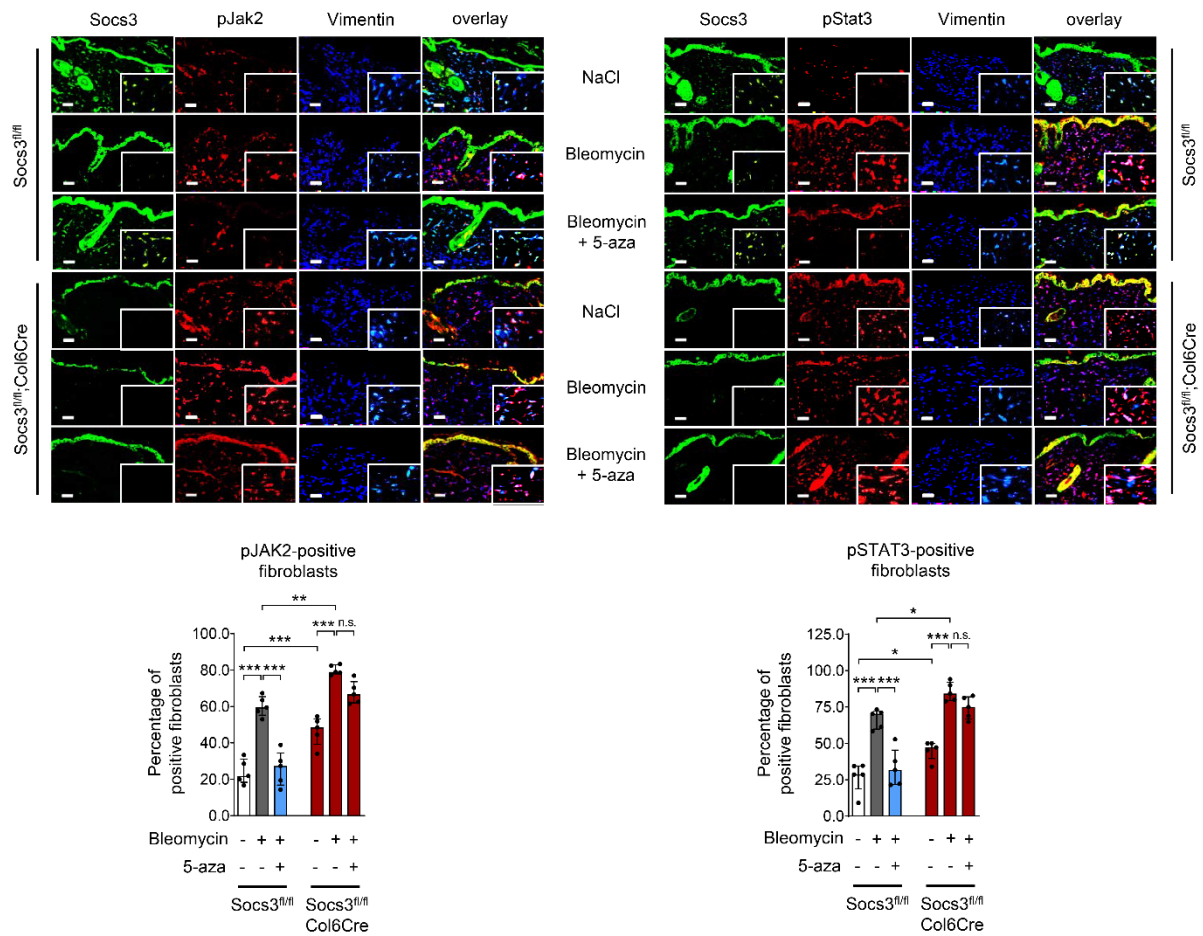

**Supplementary Figure 11: Fibroblast-specific deletion of Socs3 promotes accumulation of phosphorylated Jak2 and Stat3 in bleomycin-induced fibrosis.** Representative immunofluorescence stainings and quantitation for pJak2 (left) or pStat3 (right) costained with Socs3 and vimentin in fibroblasts in mice with conditional knockout of Socs3 challenged with bleomycin (n = 5 mice per group).

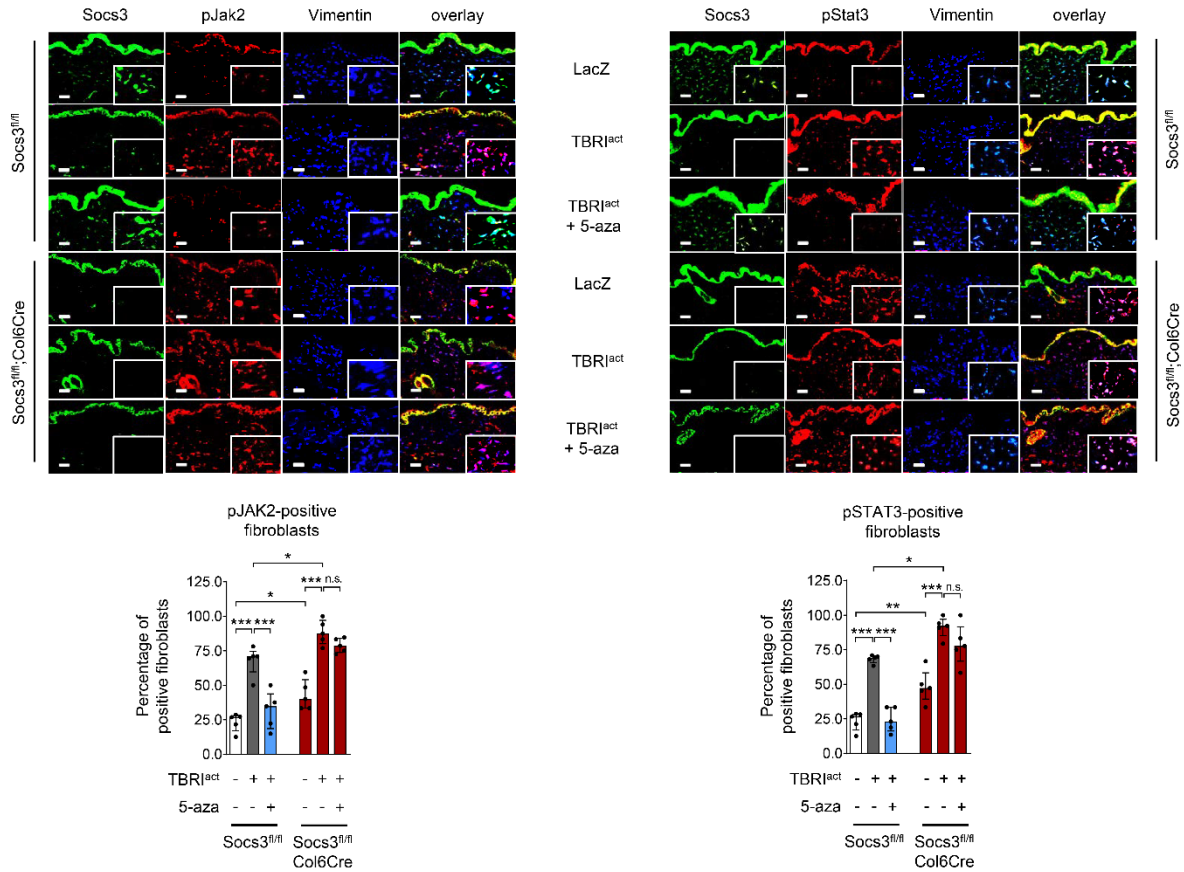

**Supplementary Figure 12: Fibroblast-specific deletion of Socs3 promotes accumulation of phosphorylated Jak2 and Stat3 in TBRI<sup>act</sup>-induced fibrosis.** Representative stainings and quantitation for pJak2 (left) or pStat3 (right) with Socs3 and Vimentin in fibroblasts in mice with conditional knockout of Socs3 overexpressing TBRI<sup>act</sup> (n = 5 mice per group). Images are shown at 200x (Scale Bar: 100  $\mu$ m) and 600x magnification. Data are depicted as the median with interquartile range. Each dot represents an individual result. One-way ANOVA with Tukey's range test as post hoc analysis was used for statistical analyses.

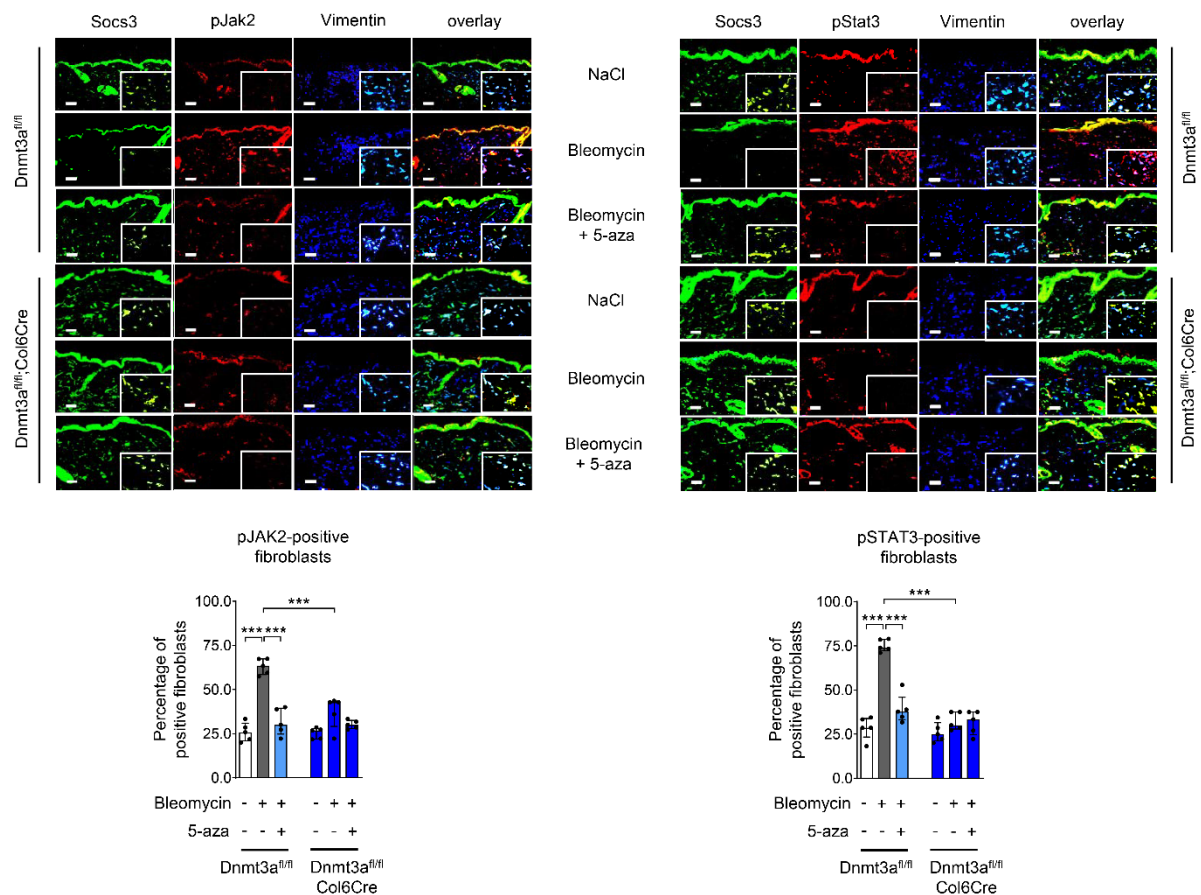

**Supplementary Figure 13: Fibroblast-specific deletion of Dnmt3a reduces accumulation of phosphorylated Jak2 and Stat3 in Bleomycin-induced fibrosis.** Representative immunofluorescence stainings and quantitation for pJak2 (left) or pStat3 (right) costained with Socs3 and Vimentin in fibroblasts in mice with conditional knockout of Dnmt3a challenged with bleomycin (n = 5 mice per group).

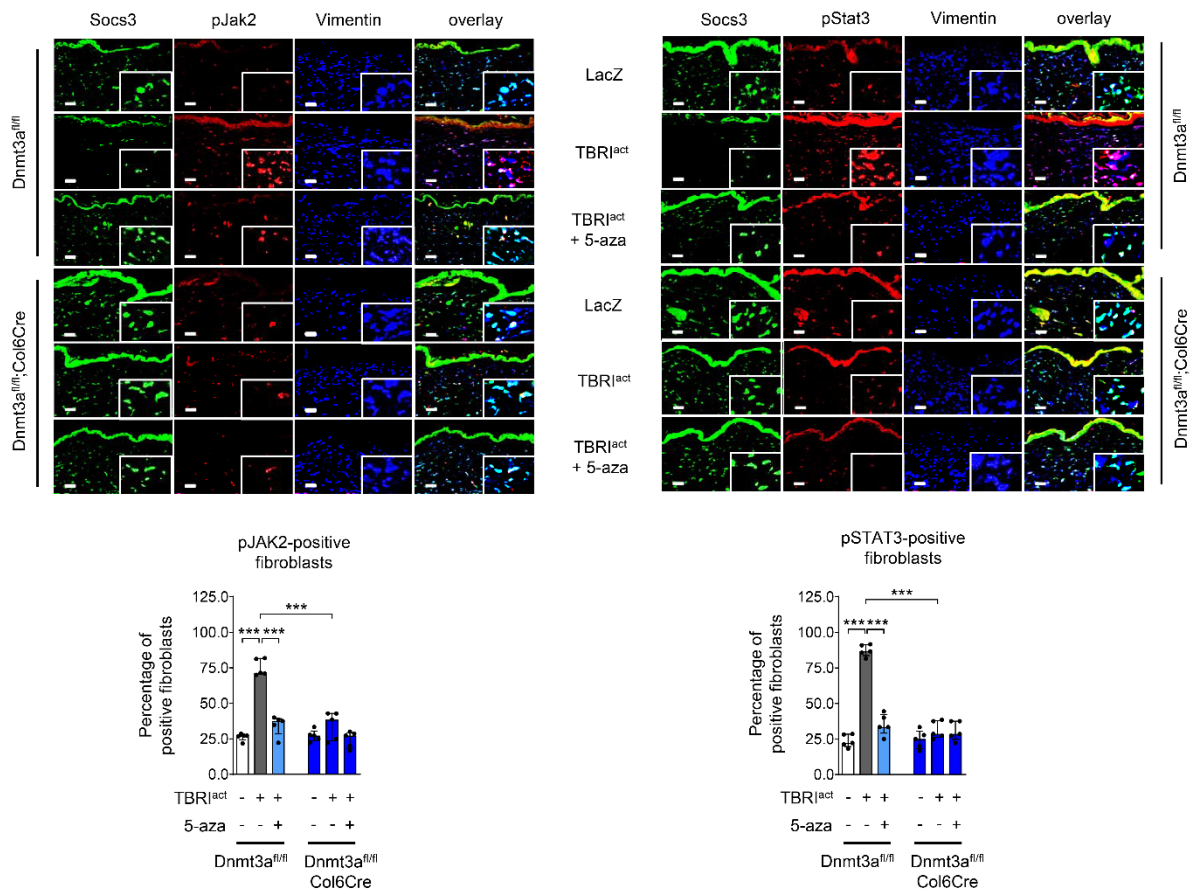

**Supplementary Figure 14: Fibroblast-specific deletion of Dnmt3a reduces accumulation of phosphorylated Jak2 and Stat3 in TBRI<sup>act</sup>-induced fibrosis.** Representative stainings and quantitation for pJak2 (left) or pStat3 (right) with Socs3 and Vimentin in fibroblasts in mice with conditional knockout of Dnmt3a overexpressing TBRI<sup>act</sup> (n = 5 mice per group).

Images are shown at 200x (Scale Bar: 100  $\mu$ m) and 600x magnification.

Data are depicted as the median with interquartile range. Each dot represents an individual result. One-way ANOVA with Tukey's range test as post hoc analysis was used for statistical analyses.

## Supplementary Tables

|                      | sense (5' -> 3')                                               | company    |
|----------------------|----------------------------------------------------------------|------------|
| <b>human SOCS3</b>   | GAA-GAG-CCU-AUU-ACA-UCU-A                                      | Eurogentec |
| <b>human DNMT3A</b>  | CAG-GAG-AUG-AUG-UCC-AAC-CC                                     |            |
| <b>human DNMT1</b>   | GAA-GAG-ACG-UAG-AGU-UAC-A                                      |            |
| <b>human JAK2</b>    | GAA-CAG-GAU-UUA-CAG-UUA-U                                      |            |
| <b>human SMAD3</b>   | ON-TARGETplus Human SMAD3 siRNA - SMARTpool (L-020067-00-0005) | Dharmacon  |
| <b>human SMAD4</b>   | ON-TARGETplus Human SMAD4 siRNA - SMARTpool (L-003902-00-0005) |            |
| <b>murine Dnmt3a</b> | GAA-CAA-GCA-GAU-GAU-UGA-A                                      |            |
| <b>murine Dnmt1</b>  | CAC-CUU-UCA-UGA-UGU-GAA-A                                      |            |

**Supplementary Table 1:** siRNA sequences

|                              |         | sequence (5' -> 3')           |
|------------------------------|---------|-------------------------------|
| methylation-specific SOCS3   | forward | GGAGATTTTAGGTTTTTCGGAATATTC   |
|                              | reverse | CCCCCGAAACTACCTAAACGCCG       |
| unmethylation-specific SOCS3 | forward | GTTGGAGATTTTAGGTTTTTGAATATTTT |
|                              | reverse | AAACCCCCAAAACCTACCTAAACACCA   |

**Supplementary Table 2:** Sequences of primers used for methylation-specific PCR.

|                         | sequence (5' -> 3')           |
|-------------------------|-------------------------------|
| human SOCS3 fwd         | TCA AGA CCT TCA GCT CCA AGA   |
| human SOCS3 rev         | CAC TGC GTT CAC CAC CAG       |
| murine Socs3 fwd        | GCG CCA CTT CTT CAC GTT       |
| murine Socs3 rev        | GGT TCT TGG TCC CCG ACT       |
| human DNMT1 fwd         | GCC TGA GAA CAC CCA CAA GT    |
| human DNMT1 rev         | TGA TGT CTG CGT GGT AGC TC    |
| human DNMT3A fwd        | ATC CAT GGC CCA GGA CTC       |
| human DNMT3A rev        | AGT CCC CAT TGG GTA ATA GCT C |
| human DNMT3B fwd        | TGTTTGTCTTGTGGCAGGAA          |
| human DNMT3B rev        | TCAAAGAGAGGGTGGGAAGGA         |
| human SMAD3 fwd         | TGG GCT GAA GCG CAC TGA CC    |
| human SMAD3 rev         | CCG CGG CTC TTG CCC ACA T     |
| human SMAD4 fwd         | CAC GGC CCT GGT CGT CGT C     |
| human SMAD4 rev         | GCC ACC CAA ACC GCT CCG T     |
| human COL1A1 fwd        | ACG AAG ACA TCC CAC CAA TC    |
| human COL1A1 rev        | ATG GTA CCT GAG GCC GTT C     |
| human COL1A2 fwd        | GGT CAG CAC CAC CGA TGT C     |
| human COL1A2 rev        | CAC GCC TGC CCT TCC TT        |
| MeDIP SOCS3 site 1 fwd  | ACGCGGGCCGTAGGTT              |
| MeDIP SOCS3 site 1 rev  | AAACCTGGTTGGTCCGGTG           |
| MeDIP SOCS3 site 2 fwd  | CGCGTCAGGGTTGGCA              |
| MeDIP SOCS3 site 2 rev  | TTGGAGACGTGCGACAGTC           |
| MeDIP SOCS3 site 3 fwd  | GACTGTGCGCACGTCTCCAA          |
| MeDIP SOCS3 site 3 rev  | CCCAACTGCGGGTCCAGG            |
| MeDIP SOCS3 site 4 fwd  | CTCCAGGTCGGCCTCCTA            |
| MeDIP SOCS3 site 4 rev  | AGGCTGATTTCTGGCAGAGG          |
| MeDIP SOCS3 site 5 fwd  | GGAAAGTGTGAATGAGAAGTTGGG      |
| MeDIP SOCS3 site 5 rev  | GAGACAAAGCGCGACGAGA           |
| MeDIP SOCS3 site 6 fwd  | CCTCTCGTCGCGCTTTGT            |
| MeDIP SOCS3 site 6 rev  | GGCCGGCCTTCTTGTAATGT          |
| MeDIP SOCS3 site 7 fwd  | CTGCTGCGAGTAGTGACTAAAC        |
| MeDIP SOCS3 site 7 rev  | CGCGCTCGCGGGTATAT             |
| MeDIP SOCS3 site 8 fwd  | GCTCCGACTTGGACTCCCT           |
| MeDIP SOCS3 site 8 rev  | GAGGGGACCAGGAGAGGGA           |
| MeDIP SOCS3 site 9 fwd  | TCCTTTGTGGACTTCACGGC          |
| MeDIP SOCS3 site 9 rev  | CCTGGTCCCGAATCGAAGTC          |
| MeDIP SOCS3 site 10 fwd | GGACCAGGTAGGAAGGAGGA          |
| MeDIP SOCS3 site 10 rev | CCTACCTCGTCACCTCCCT           |
| MeDIP SOCS3 site 11 fwd | CTACTGGACTGAGCGGCG            |
| MeDIP SOCS3 site 11 rev | GGCGCAGCGTGGGAA               |
| MeDIP SOCS3 site 12 fwd | CCTGGAGACCTAACTTCCGC          |
| MeDIP SOCS3 site 12 rev | GATCCAGGCGCCTCACG             |



|                                               |                         |
|-----------------------------------------------|-------------------------|
| MeDIP SOCS3 site 13 fwd                       | TTCCGGGCACTCAACGC       |
| MeDIP SOCS3 site 13 rev                       | AAACTTGCTGTGGGTGACCA    |
| MeDIP SOCS3 site 14 fwd                       | CAGCTCCAAGAGCGAGTACC    |
| MeDIP SOCS3 site 14 rev                       | TGTCGCGGATCAGAAAGGTG    |
| ChIP DNMT3A <sub>prom</sub> (SBE1: -3423) fwd | GGACCCTCATATGAGTGGAATCC |
| ChIP DNMT3A <sub>prom</sub> (SBE1: -3423) rev | AGGGAGTCCTGACACCTGTT    |
| ChIP DNMT3A <sub>prom</sub> (SBE2: -2630) fwd | CCTGTCCTGATACTGCCACA    |
| ChIP DNMT3A <sub>prom</sub> (SBE2: -2630) rev | GGTTTAGCCTCTCGGCTTCT    |
| ChIP DNMT3A <sub>prom</sub> (SBE3: -2462) fwd | TCTGGAACCAACCCTGTAGC    |
| ChIP DNMT3A <sub>prom</sub> (SBE3: -2462) rev | GGTCAAGAGGTCCAAGGTGA    |
| ChIP DNMT3A <sub>prom</sub> (SBE4: -1459) fwd | CTTCATCTGTAGCGTGAGGAGA  |
| ChIP DNMT3A <sub>prom</sub> (SBE4: -1459) rev | ATATAACACGGCCCCAAACA    |

**Supplementary Table 3:** Sequences of primers used for qPCR.
